# Supplementary material for: A Widely Metabolomic Analysis Revealed Metabolic Alterations of Epimedium Pubescens Leaves at Different Growth Stages
Source: PubMed Central journal article supplement (PMC6982732; doi:10.3390/molecules25010137), 2019-12-29
Supplement: molecules-25-00137-s001.pdf [file molecules-25-00137-s001.pdf]

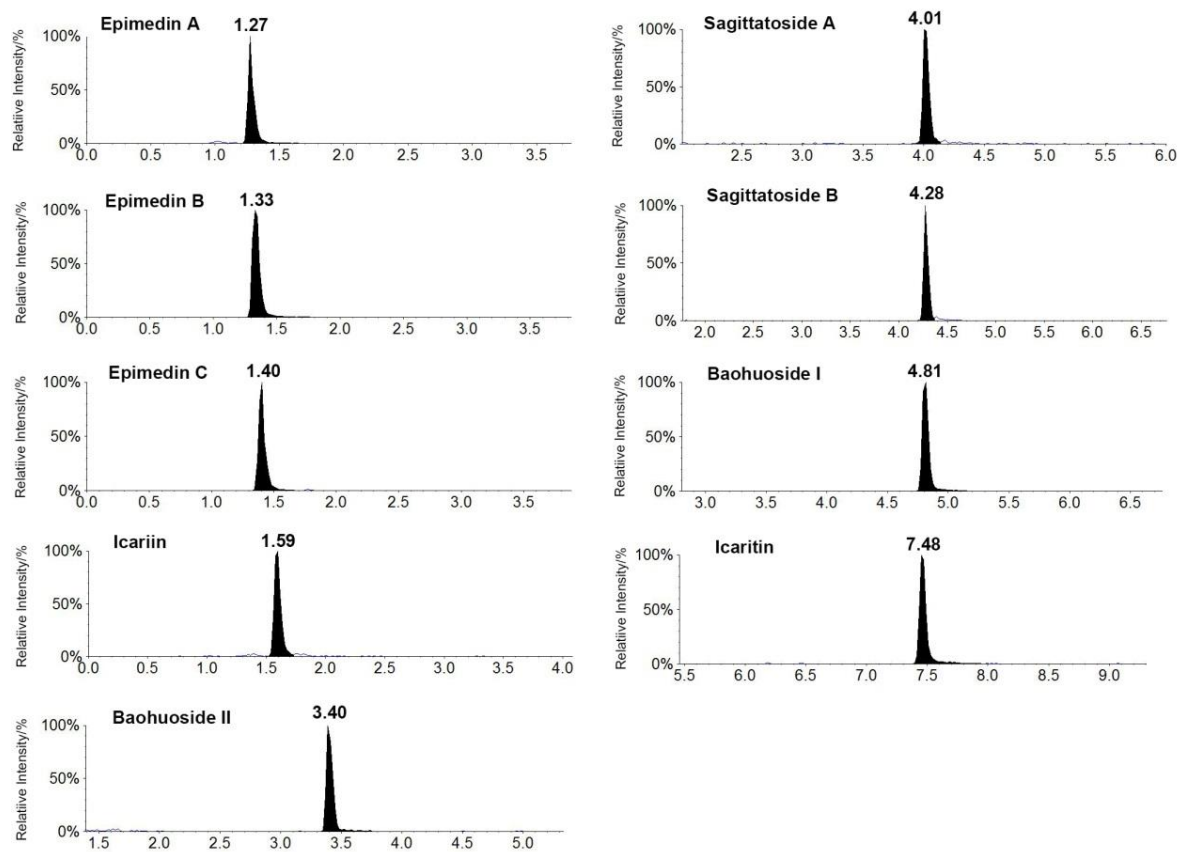

**Figure S1.** Representative extraction MRM chromatograms (XIC) of nine reference standards in negative ion mode.

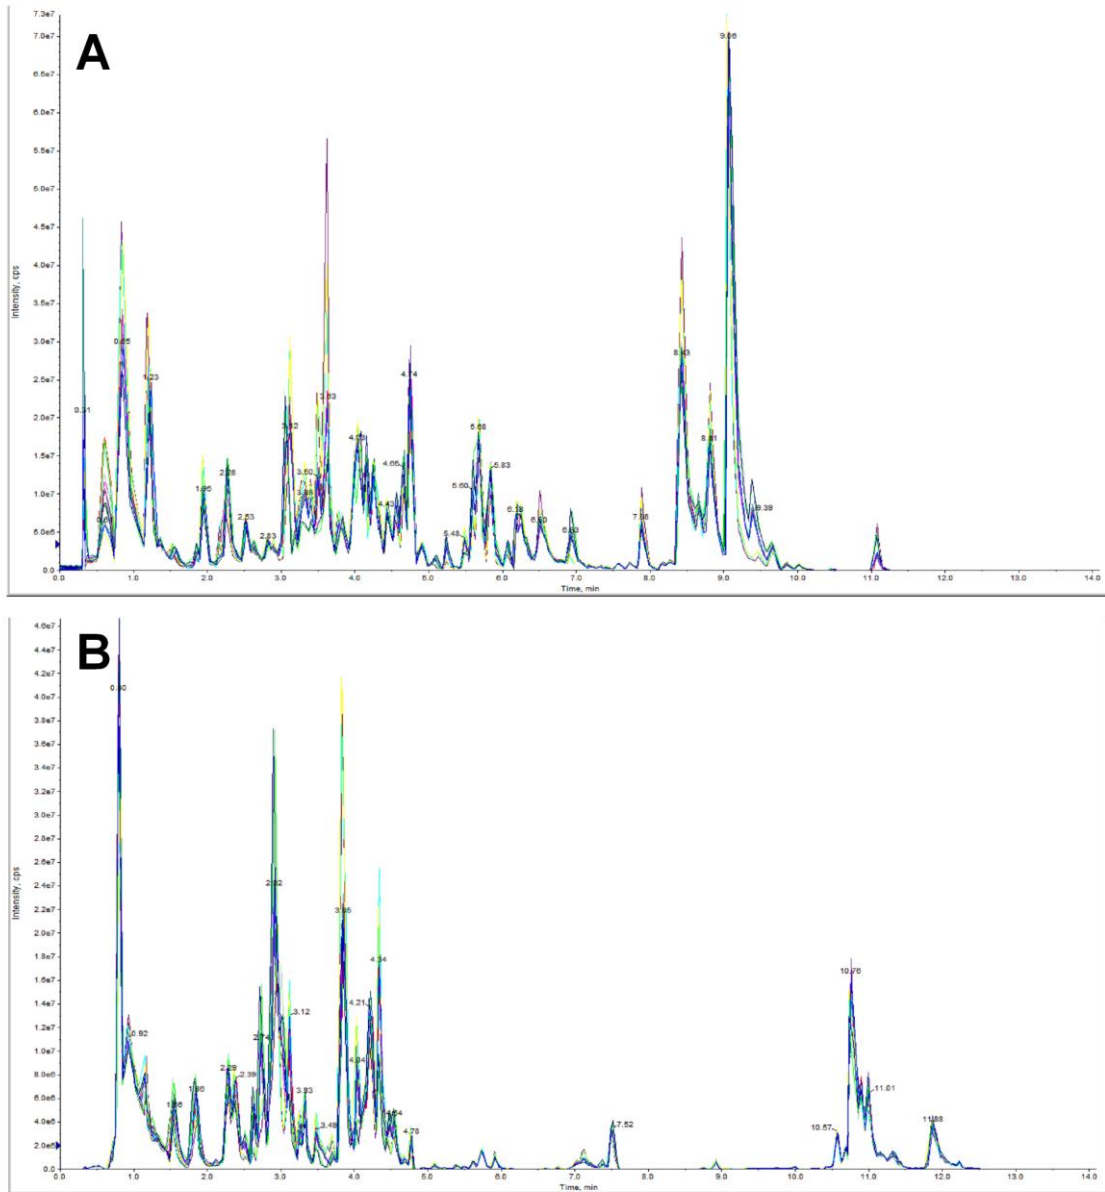

**Figure S2.** The overlapped total ion chromatograms of *E. pubescens* QC samples showing the accuracy and reproducibility of metabolite detection operated on our analytic platform. (A) positive ESI mode and (B) negative ESI mode.

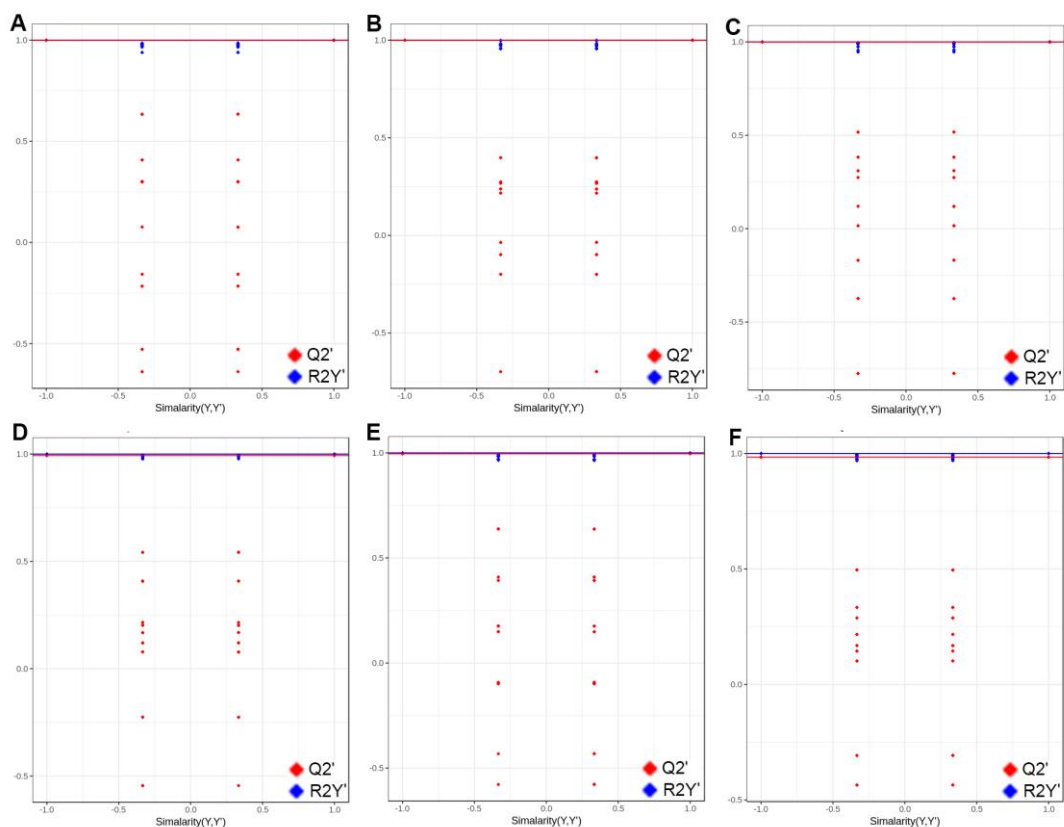

**Figure S3.** Permutation tests on OPLS-DA models. The horizontal line represented R2Y and Q2 calculated in the original OPLS-DA model. R2'Y and Q2' calculated by permutation tests.

**Table S4.** Method validation for simultaneous quantification of icariin analogues in *E. pubescens* samples.

| Analyte         | Regression equation | r <sup>2</sup> | Linear range (ug/ml) | LOD (ng/ml) | LOQ (ng/ml) |
|-----------------|---------------------|----------------|----------------------|-------------|-------------|
| epimedin A      | y=2100x-6990        | 0.9979         | 0.0162-0.54          | 1.873       | 6.242       |
| epimedin B      | y=2090x-10200       | 0.9972         | 0.0278-0.555         | 3.918       | 13.059      |
| epimedin C      | y=728x-9970         | 0.9984         | 0.053-10.6           | 5.678       | 18.928      |
| icariin         | y=5410x+6710        | 0.9998         | 0.0103-0.515         | 0.515       | 1.717       |
| baohuoside I    | y=22300x+55400      | 0.9986         | 0.00515-0.386        | 0.2116      | 0.7055      |
| baohuoside II   | y=13500x+3390       | 0.9996         | 0.00129-0.645        | 0.2764      | 0.9214      |
| sagittatoside A | y=2060x+3190        | 0.9995         | 0.0054-0.405         | 0.7714      | 2.5714      |
| sagittatoside B | y=4100x+2630        | 0.9991         | 0.002475-0.495       | 0.2121      | 0.7071      |
| icaritin        | y=25600x+5840       | 0.9990         | 0.00107-0.0535       | 0.2816      | 0.9386      |
